# Supplementary material for: Effects of co-formulants on the absorption and secretion of active substances in plant protection products in vitro
Source: PubMed Central journal article supplement (PMC8448693; doi:10.1007/s00204-021-03140-x), 2021-08-20
Supplement: 204_2021_3140_MOESM1_ESM.pdf [file 204_2021_3140_MOESM1_ESM.pdf]

## **Toxicokinetic mixture effects of co-formulants and active substances in plant protection products *in vitro***

Karaca, Mawien<sup>1,2</sup>, Fischer, Benjamin<sup>1</sup>, Willenbockel, Christian Tobias<sup>1</sup>, Tewes Tralau<sup>1</sup>, Marx-Stoelting, Philip<sup>1,2\*</sup>, Bloch, Denise<sup>1\*</sup>

<sup>1</sup> German Federal Institute for Risk Assessment, Department of Pesticides Safety, Max-Dohrn-Straße 8-10, 10589 Berlin, Germany

<sup>2</sup> Technical University of Berlin, Institute for Chemistry, Straße des 17. Juni 115, 10623 Berlin, Germany

\* Correspondence to: Marx-Stoelting, P. or Bloch, D.; German Federal Institute for Risk Assessment, Berlin 1589 Berlin, Germany; E-mail: [Philip.Marx-Stoelting@bfr.bund.de](mailto:Philip.Marx-Stoelting@bfr.bund.de) or [Denise.Bloch@bfr.bund.de](mailto:Denise.Bloch@bfr.bund.de)

Bloch, D. and Marx-Stoelting, P. contributed equally to this paper

# Supplementary Information

**a**

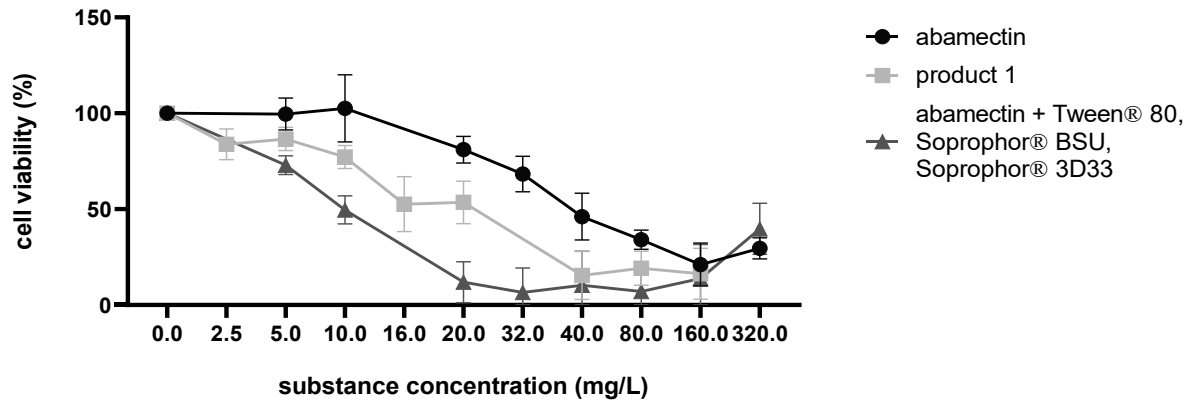

**b**

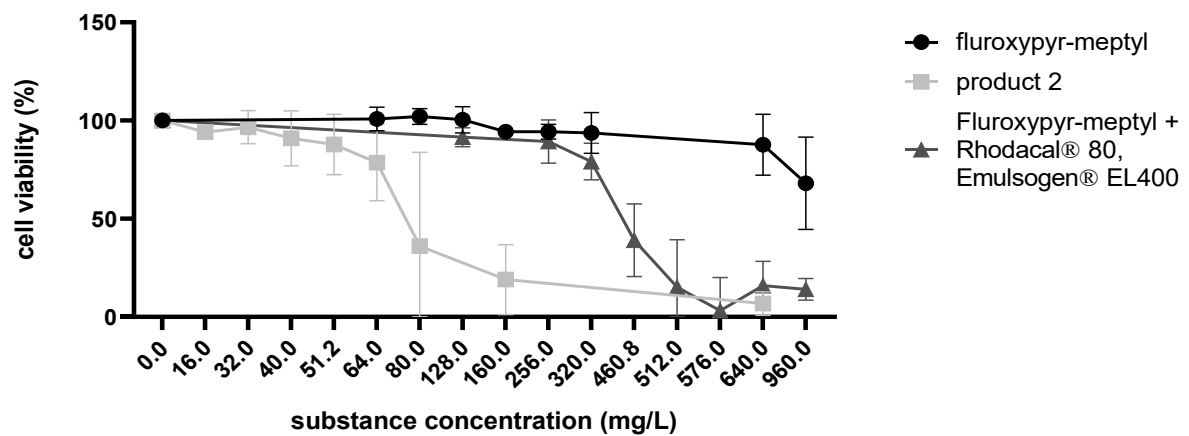

**c**

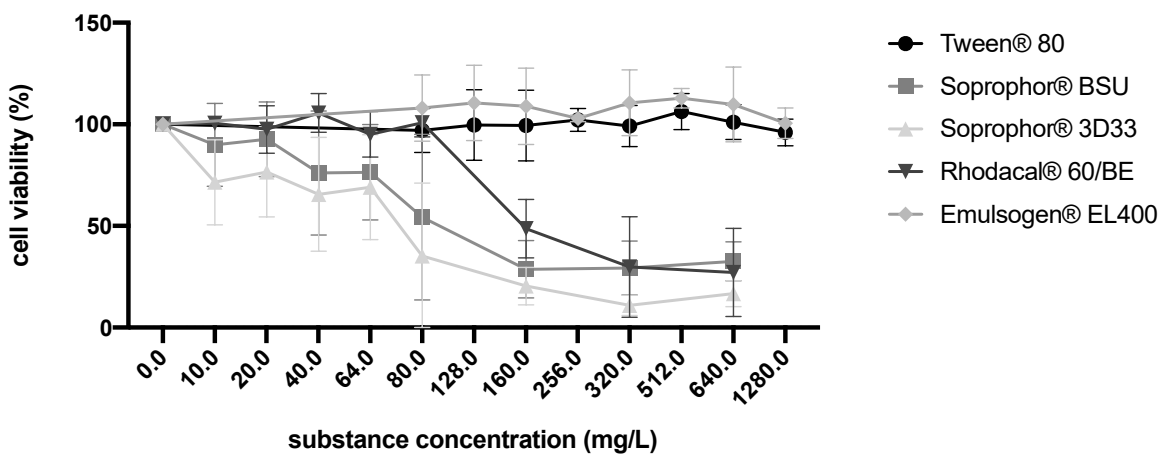

**Fig. S1** Results of the NRU cytotoxicity assay in Caco-2 cells after 24 h exposure to increasing concentrations of the single active ingredients and investigated co-formulants, their respective mixtures in the same ratio as in the PPPs and the PPPs. Results are shown as percentage of the viability of the solvent control containing 0.4% DMSO. Triton-X served as a positive control. Concentrations of the mixtures and the PPPs are related to the concentration of the contained active ingredient. Mean values  $\pm$  SD of  $n = 3$  biological replicates, each performed with six technical replicates, are given.

**a**

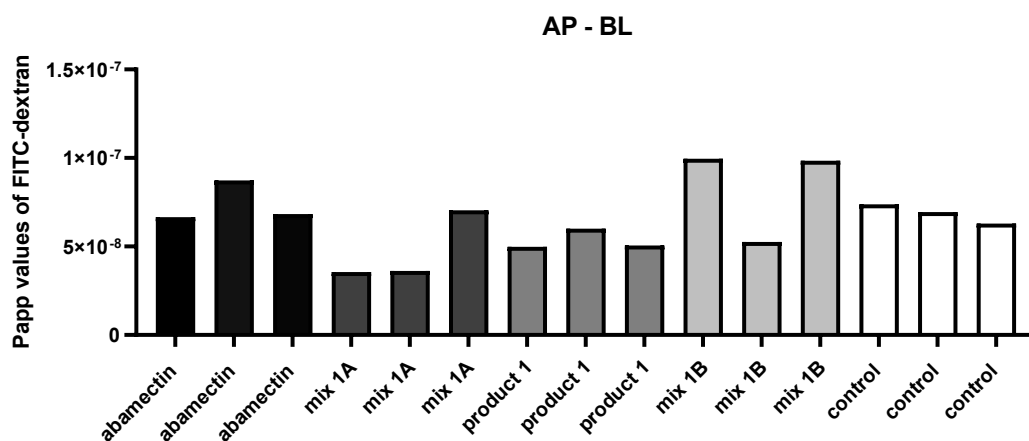

**b**

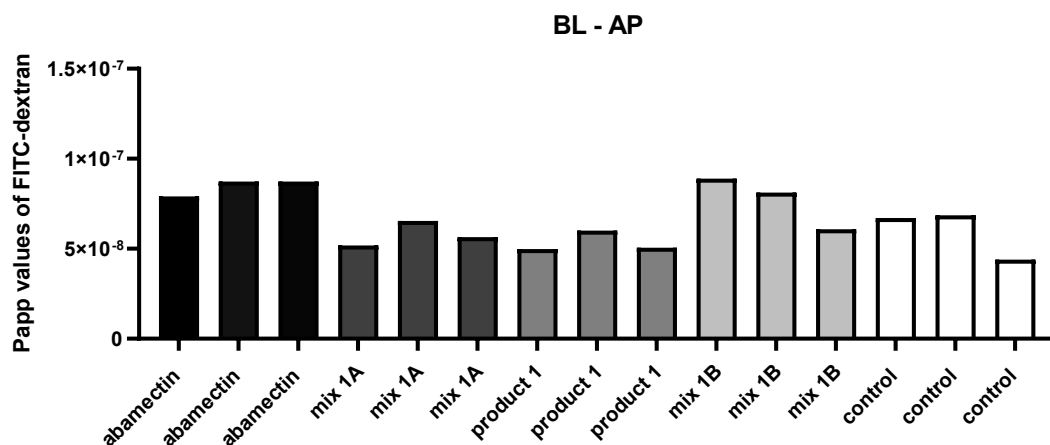

**c**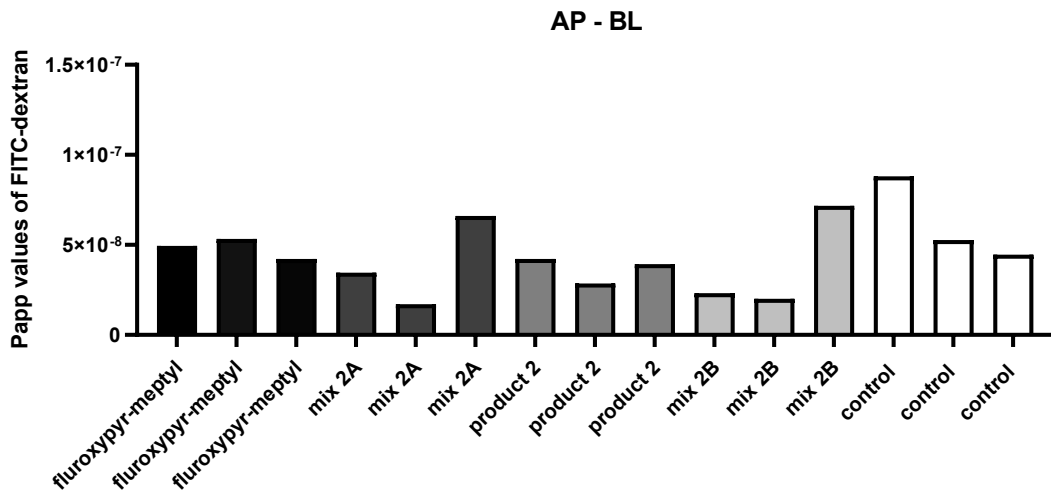**d**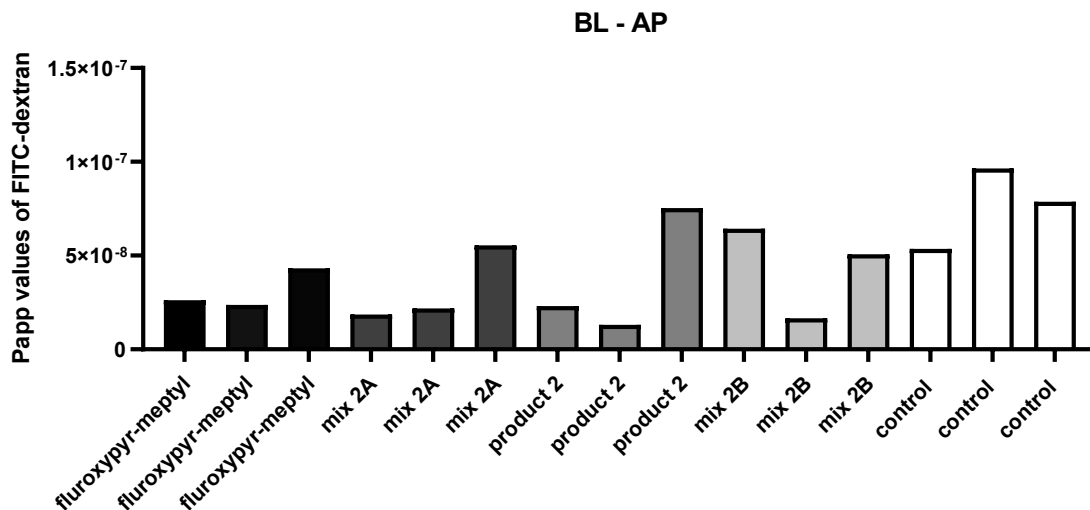

**Fig. S2** Results of FITC-dextran flux (Papp values) representing cell layer integrity in transport studies of (a-b) 1 mg/L abamectin, mix 1A (1 mg/L abamectin + 4,2 mg/L Tween® 80, 1 mg/L Soprophor® BSU, 1 mg/L Soprophor® 3D33), product 1 (containing 1 mg/L abamectin) and mix 1B (1 mg/L abamectin + 80 mg/L Tween® 80, 40 mg/L Soprophor® BSU, 40 mg/L Soprophor® 3D33) and (b-c) 1 mg/L fluroxypyr-meptyl, mix 2A (1 mg/L fluroxypyr-meptyl + 0.1 mg/L Rhodacal® 60/BE, 0.2 mg/L Emulsogen® EL400), product 2 (containing 1 mg/L fluroxypyr-meptyl) and mix 2B (1 mg/L abamectin + 120 mg/L Rhodacal® 60/BE, 120 mg/L Emulsogen® EL400, 160 mg/L Solgad® 150 ULN).

**a**

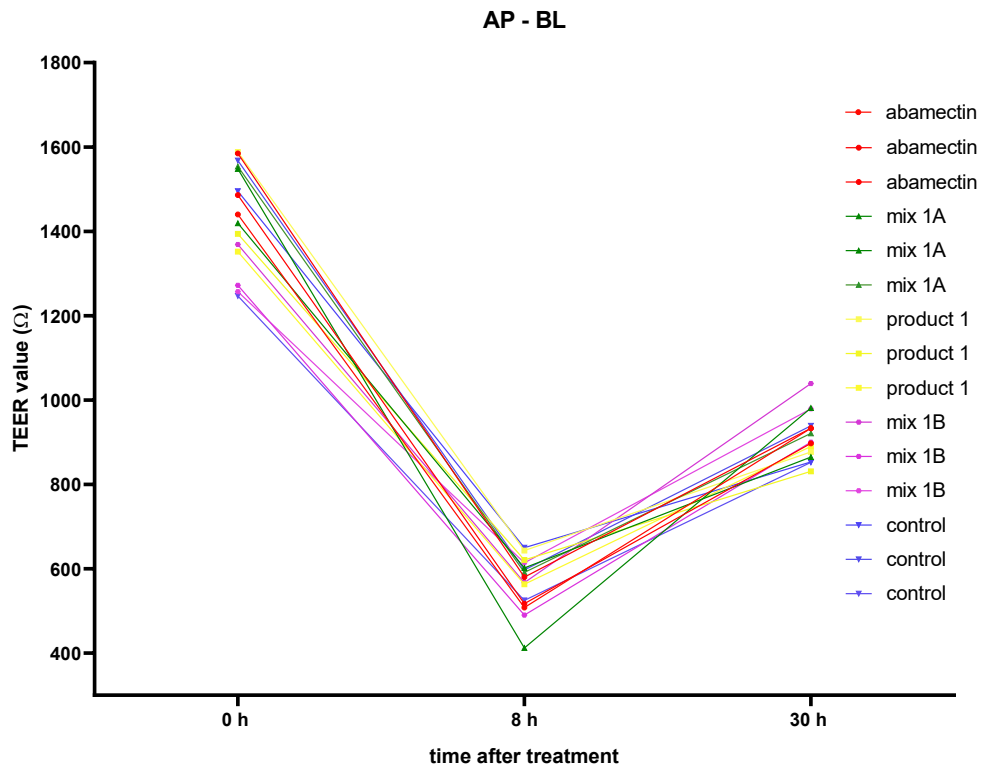

**b**

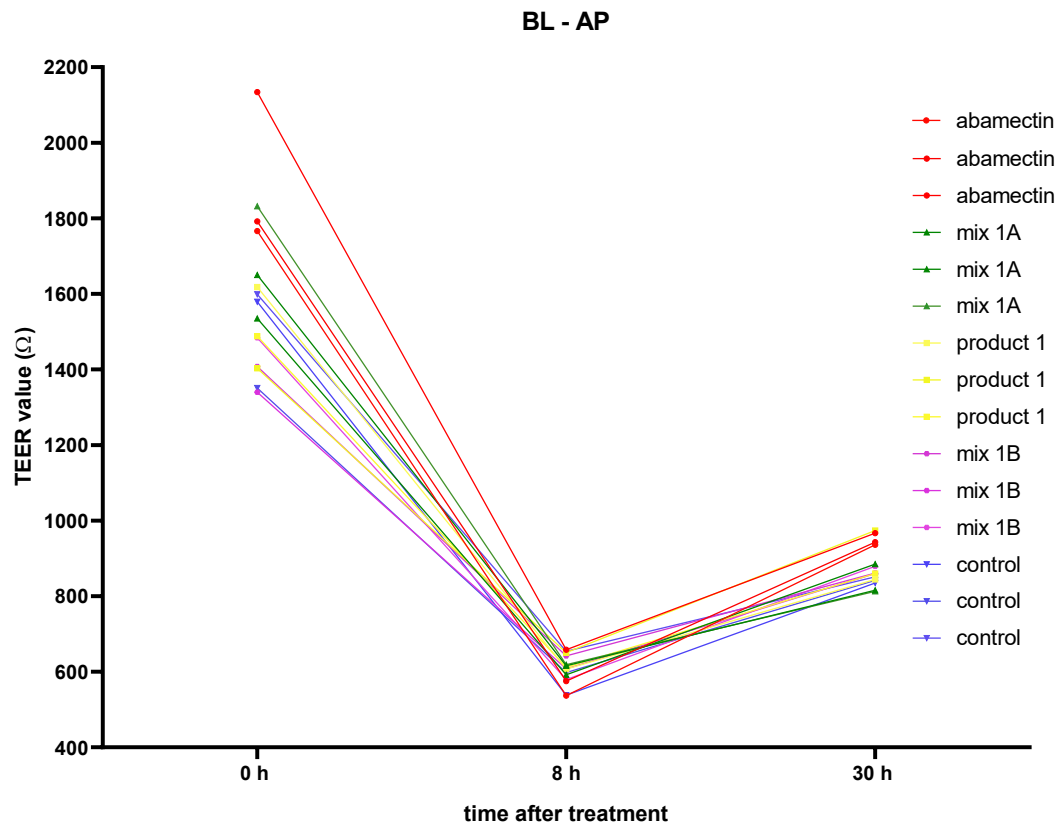

**c**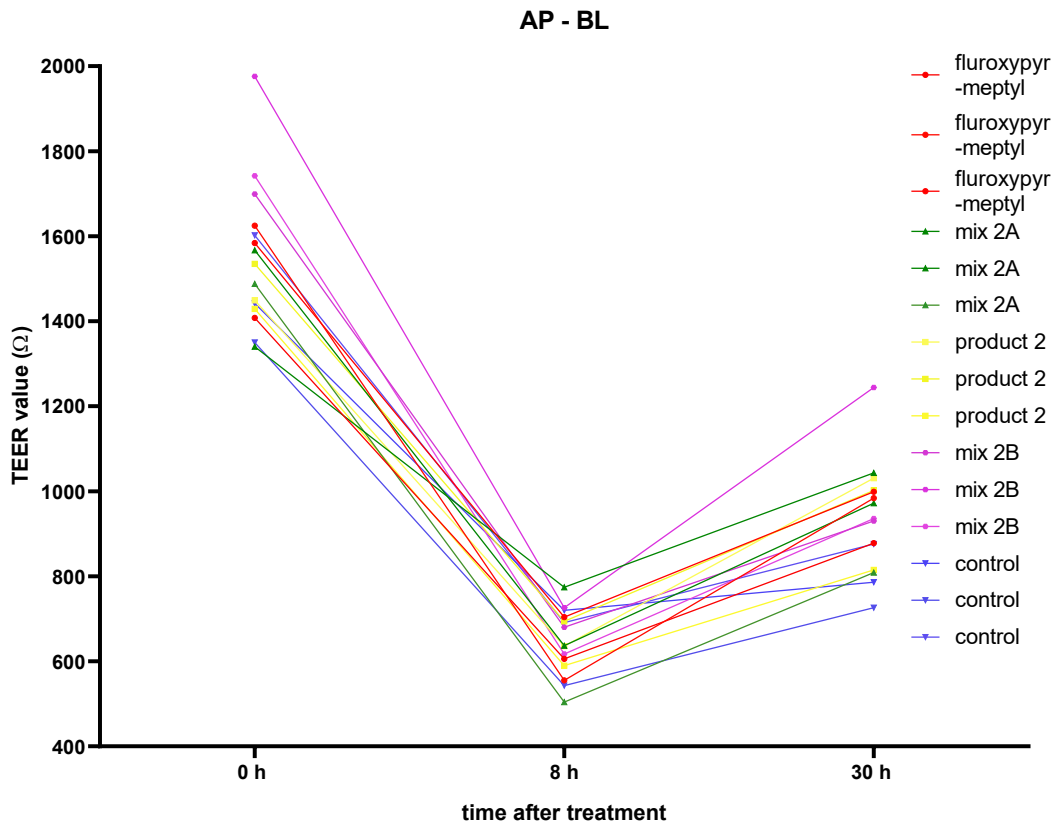**d**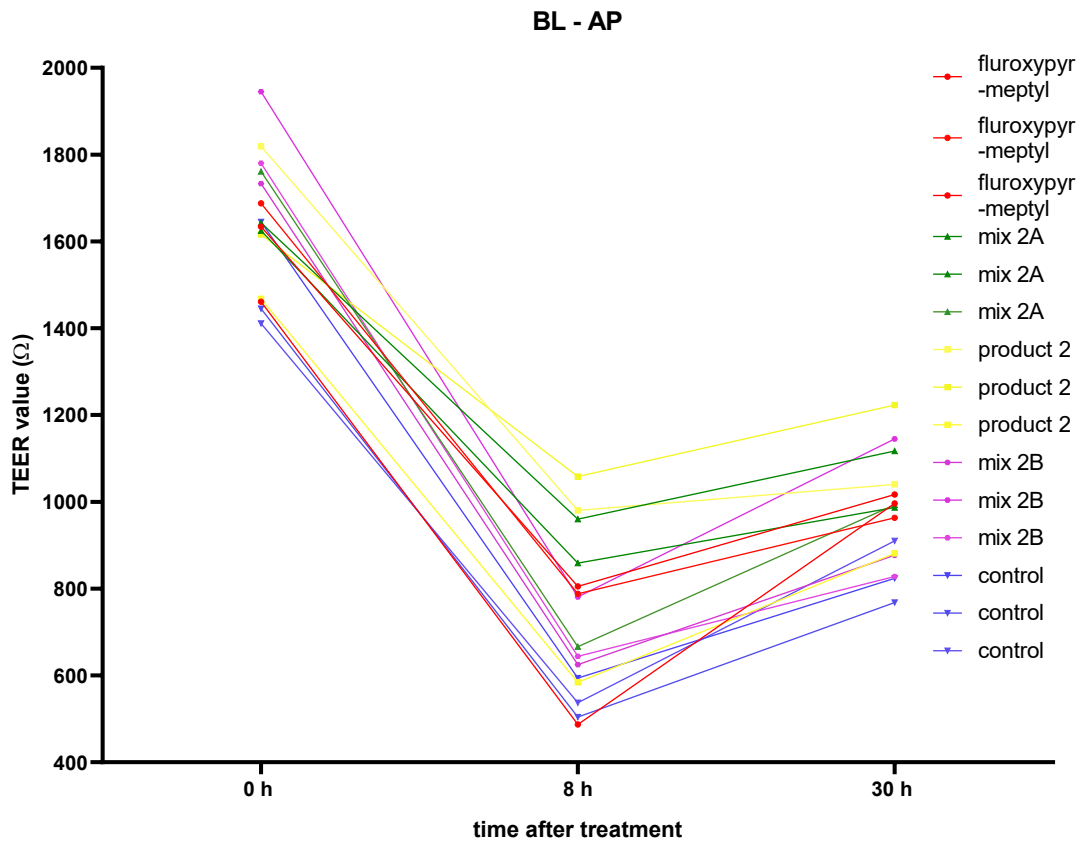

**Fig. S3** Results of transepithelial electrical resistance measurements (TEER values) representing cell layer integrity in transport studies of (a-b) 1 mg/L abamectin, mix 1 (1 mg/L abamectin + 4,2 mg/L Tween® 80, 1 mg/L Soprophor® BSU, 1 mg/L Soprophor® 3D33), product 1 (containing 1 mg/L abamectin) and mix 2 (1 mg/L abamectin + 80 mg/L Tween® 80, 40 mg/L Soprophor® BSU, 40 mg/L Soprophor® 3D33) and (c-d) 1 mg/L fluroxypyr-meptyl, mix 1 (1 mg/L fluroxypyr-meptyl + 0.1 mg/L Rhodacal® 60/BE, 0.2 mg/L Emulsogen® EL400), product 2 (containing 1 mg/L fluroxypyr-meptyl) and mix 2 (1 mg/L abamectin + 120 mg/L Rhodacal® 60/BE, 120 mg/L Emulsogen® EL400, 160 mg/L Solgad® 150 ULN).

**a**

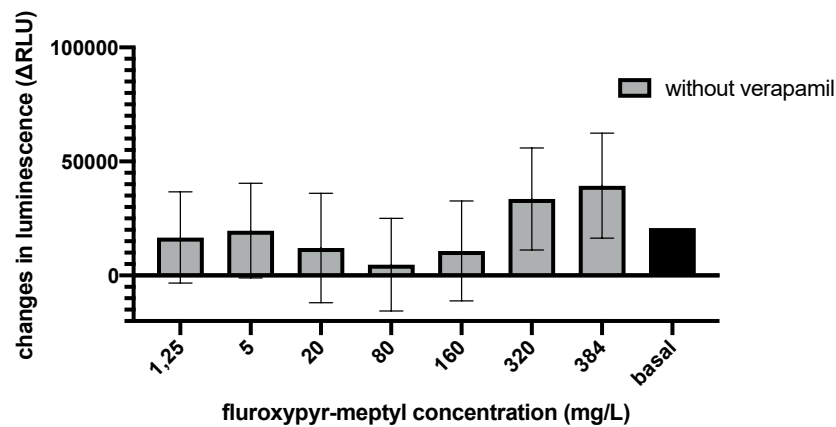

**b**

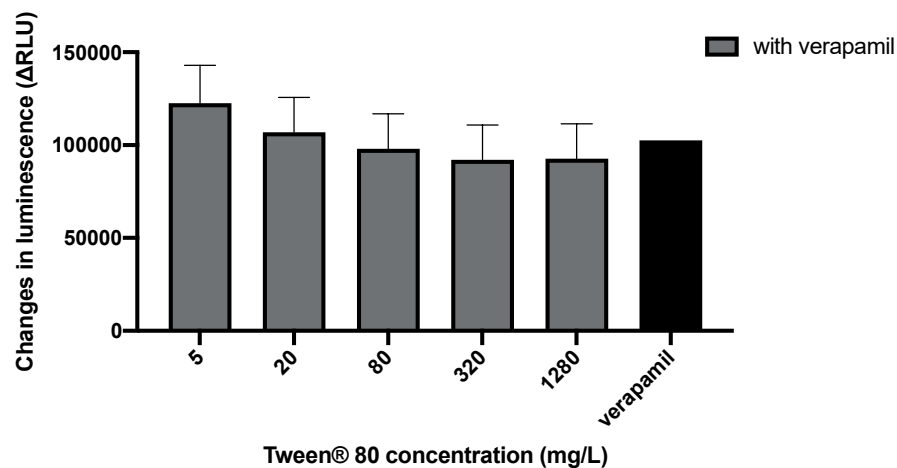

**C**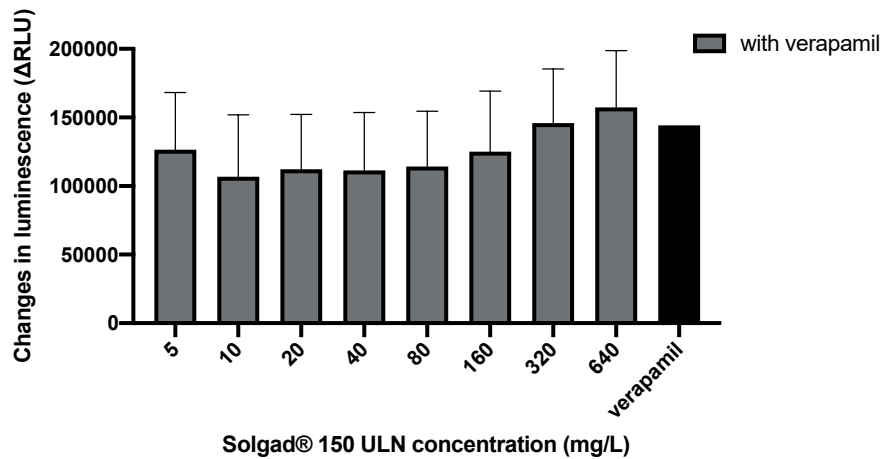

**Fig. S4** Pgp ATPase activity presented as changes in luminescence  $\Delta$ RLU of (a) fluroxypyr-meptyl compared to untreated samples (basal) and (b) Tween® 80 and (c) Solgad® 150 ULN after stimulation with verapamil compared to verapamil control. All measurements were corrected by subtraction of  $\text{Na}_3\text{VO}_4$  treated signals (non Pgp ATPase activity). Data are presented as mean values of  $n = 4$  independent experiments. Error bars indicate confidence intervals obtained from statistical analysis using an either two-sided (error bars in both direction) or one-sided (error bars in one direction) post-hoc Dunnett-test, with a preceding linear mixed-effects ANOVA test ( $\alpha = 0.05$ ).



**Table S1**

Gradient conditions for avermectin B1a analysis

---

| Time<br>(min:sec) | % A (0.1% (v/v) formic acid in water) | % B (0.1% (v/v) formic acid in acetonitrile) |
|-------------------|---------------------------------------|----------------------------------------------|
| 0:00              | 20                                    | 80                                           |
| 1:00              | 5                                     | 95                                           |
| 3:00              | 5                                     | 95                                           |
| 3:50              | 20                                    | 80                                           |
| 8:00              | 20                                    | 80                                           |

---

**Table S2**

Gradient conditions for fluroxypyr-meptyl analysis

---

| Time<br>(min:sec) | % A (0.1% (v/v) formic acid in water) | % B (0.1% (v/v) formic acid in acetonitrile) |
|-------------------|---------------------------------------|----------------------------------------------|
| 0:00              | 30                                    | 70                                           |
| 2:00              | 30                                    | 70                                           |
| 4:00              | 10                                    | 90                                           |
| 10:00             | 10                                    | 90                                           |
| 10:05             | 30                                    | 70                                           |
| 13:00             | 30                                    | 70                                           |

---
